# 1 Rapidly processed stool swabs approximate stool 2 microbiota profiles

3  
4 Nicholas A. Bokulich<sup>1</sup>, Juan Maldonado<sup>2,3,4</sup>, Dae-Wook Kang<sup>2,3,§</sup>, Rosa Krajmalnik-  
5 Brown<sup>2,3,5</sup>, J. Gregory Caporaso<sup>1,6,#</sup>

6 <sup>1</sup>The Pathogen and Microbiome Institute, Northern Arizona University, Flagstaff, AZ,  
7 USA

8 <sup>2</sup>Biodesign Swette Center for Environmental Biotechnology, Arizona State University,  
9 Tempe, AZ, USA

10 <sup>3</sup>Biodesign Center for Fundamental and Applied Microbiomics, Arizona State University,  
11 Tempe, AZ, USA

12 <sup>4</sup>ASU Genomics Core, Biodesign Institute, Arizona State University, Tempe, AZ, USA

13 <sup>5</sup>School of Sustainable Engineering and the Built Environment, Arizona State University,  
14 Tempe, AZ, USA

15 <sup>6</sup>Department of Biological Sciences, Northern Arizona University, Flagstaff, AZ, USA

16 <sup>§</sup>Current address: Department of Civil and Environmental Engineering, University of  
17 Toledo, Toledo, OH, USA

18

19 #Corresponding author

20 J. Gregory Caporaso

21 Department of Biological Sciences

22 1298 S Knoles Drive

23 Building 56, 3rd Floor  
24 Northern Arizona University  
25 Flagstaff, AZ, USA  
26 (303) 523-5485  
27 (303) 523-4015 (fax)  
28 Email: [gregcaporaso@gmail.com](mailto:gregcaporaso@gmail.com)

29

## 30 **Abstract**

31 Studies of the intestinal microbiome commonly utilize stool samples to measure microbial  
32 composition in the distal gut. However, collection of stool can be difficult from some subjects  
33 under certain experimental conditions. In this study we validate the use of swabs of fecal matter  
34 to approximate measurements of microbiota in stool using 16S rRNA gene Illumina amplicon  
35 sequencing, and evaluate the effects of shipping time at ambient temperatures on accuracy.  
36 Results indicate that swab samples reliably replicate stool microbiota bacterial composition,  
37 alpha diversity, and beta diversity when swabs are processed quickly (< 2 days), but sample  
38 quality quickly degrades after this period, accompanied by increased abundances of  
39 *Enterobacteriaceae*. Fresh swabs appear to be a viable alternative to stool sampling when  
40 standard collection methods are challenging, but extended exposure to ambient temperatures  
41 prior to processing threatens sample integrity.

42

42

## 43 **Introduction**

44 The microbial communities inhabiting the human gastrointestinal tract play important roles in  
45 digestion, immune and metabolic regulation, and disease (1). Monitoring the gut microbiota is  
46 often performed to assess the impact of disease or other disturbances (2), therapeutic  
47 interventions (3), or host development (4). Measurements of microbiota composition in the distal  
48 gut commonly utilize stool samples.

49 Collection and transport of stool may be difficult or impossible, however, under certain  
50 conditions, e.g., due to stool consistency or if subjects are unable or unwilling to provide stool.

51 In a study by Sinha et al., the microbial compositions of stool swabs correlated closely with stool  
52 (5); however, this study only assessed the similarity of swab microbiota to stool at two different  
53 storage times (fresh and after 4 days at room temperature). With a similar approach, Bassis and  
54 coworkers showed that collecting and immediately processing rectal swabs also approximated  
55 stool microbiota composition (6). Rectal swabs are collected by insertion of a sterile swab into  
56 the rectum; fecal swabs are collected by applying a sterile swab to freshly passed stool or toilet  
57 paper. Collection of fecal swabs represents a simpler and less disruptive approach than either  
58 stool collection or rectal swabbing, permitting its use with sensitive patients. Swab collection  
59 also simplifies sample handling and processing during collection, archiving, and DNA extraction.  
60 This facilitates sampling under busy clinical settings or by individual subjects at home.

61 To validate stool swabs for measurements of intestinal microbiota, stool swabs and stool  
62 samples were collected from subjects in the autism MTT study from identical stool samples, and  
63 microbiota composition and diversity were compared between sample pairs using 16S rRNA

64 gene amplicon sequencing and analysis in the QIIME 2 software package (7). We show that  
65 swab and stool samples exhibit highly similar microbiota profiles, provided that the swabs were  
66 received and processed within two days of collection.

## 67 **Results**

68 An accurate measurement of intestinal microbiota composition should demonstrate a high  
69 degree of similarity to stool composition, the current gold standard method. We measured  
70 phylogenetic similarity between samples using abundance-weighted and unweighted pairwise  
71 UniFrac distance (8). We also measured paired differences in observed richness of sequence  
72 variants, phylogenetic diversity (PD) (9), and Shannon diversity and evenness to assess alpha  
73 diversity differences between swab and stool samples.

### 74 **Fresh swab microbiota resemble stool**

75 Freshly processed ( $\leq 2$  days) pairs of stool and swab samples collected from the same  
76 individual at the same time (paired samples) were significantly more similar to each other than  
77 to stool or swab samples collected from the same individual but collected at different times  
78 (within-subject pairs), suggesting that stool and swab samples yield similar community  
79 structures when swabs are processed quickly (Figure 1) (weighted UniFrac Mann-Whitney U =  
80 294.5, P = 0.007; unweighted UniFrac U = 342.5, P = 0.024). Swabs experiencing longer  
81 transport times were not significantly more similar to their stool pairs than they were to within-  
82 subject pairs (P > 0.05), suggesting that shipping times longer than 2 days do not reliably  
83 represent the microbiome of stool samples frozen at the time of collection.

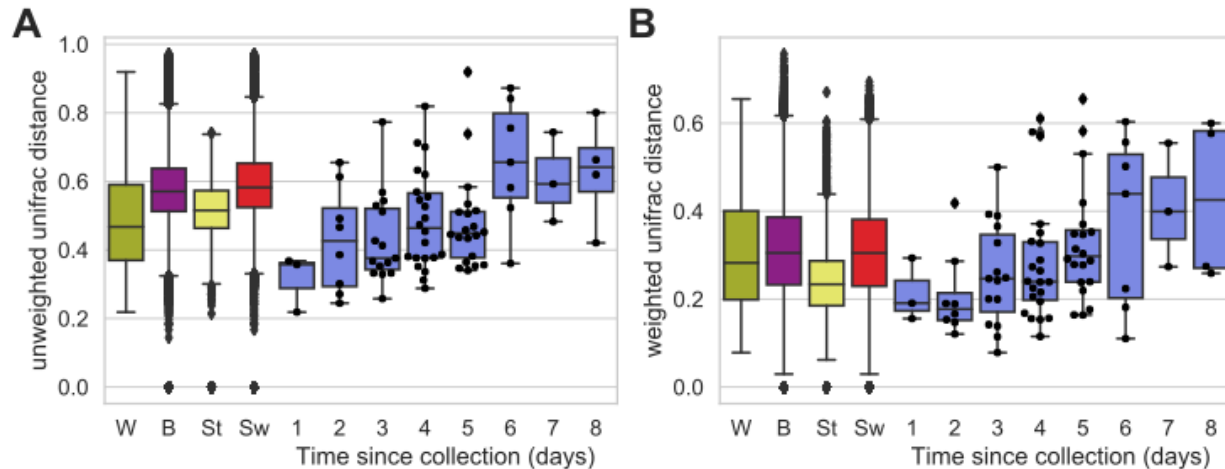

84

85 Figure 1. Unweighted (A) and Weighted (B) UniFrac distance distributions between sample  
86 pairs. Boxplots compare distance distributions between all samples collected from within each  
87 individual subject (“W”, green), between all subjects (“B”, purple), between all stool samples  
88 (“St”, yellow) or all swab samples (“Sw”, red) collected from the same subject at different times,  
89 and between pairs of stool and swab samples collected from the same individual at the same  
90 time (paired samples, shown in blue). Swarmplots are overlaid for paired distance  
91 measurements between swab and stool samples only, indicating the actual distribution of paired  
92 distances.

93

94 transport time degrades swab accuracy

95 Both unweighted and weighted UniFrac paired sample distances increase as swab shipping  
96 time increases (Figure 1), becoming significantly more dissimilar than within-subject pairs by 6  
97 days of shipping (Wilcoxon  $P < 0.05$ ); transport time is positively correlated with paired sample  
98 dissimilarity for both weighted (Spearman  $R = 0.88$ ,  $P = 0.004$ ) and unweighted UniFrac ( $R =$   
99  $0.88$ ,  $P = 0.004$ ). Thus, transport times above 1-2 days appear to have a damaging effect on

100 swab compositional accuracy, similar to the negative effects of room-temperature storage on  
101 stool compositional accuracy (10).

102 Pairwise differences in alpha diversity between paired samples (swab – stool observed  
103 diversity) indicates that swab richness decreases as transport time increases (Spearman  $R = -$   
104  $0.86$ ,  $P = 0.006$ ) and PD ( $R = -0.88$ ,  $P = 0.004$ ). Shannon diversity ( $R = -0.64$ ,  $P = 0.086$ ) and  
105 evenness ( $R = -0.57$ ,  $P = 0.139$ ) also decrease with increasing transport time, but the  
106 correlations are not significant (Figure 2). After 4 days of transport time, swab richness,  
107 Shannon diversity, and evenness, but not PD, are significantly lower than stool (Wilcoxon  $P <$   
108  $0.05$ ), but transport time under 4 days does not significantly impact these alpha diversity  
109 metrics. This decrease in richness and evenness likely indicates that growth of one or more  
110 bacterial species (facultatively aerobic enterobacteria, as results below suggest) numerically  
111 overshadows the abundance of other bacteria (e.g., strict anaerobes and slower-growing  
112 organisms). The latter organisms do not disappear from this closed system, but become less  
113 likely to detect.

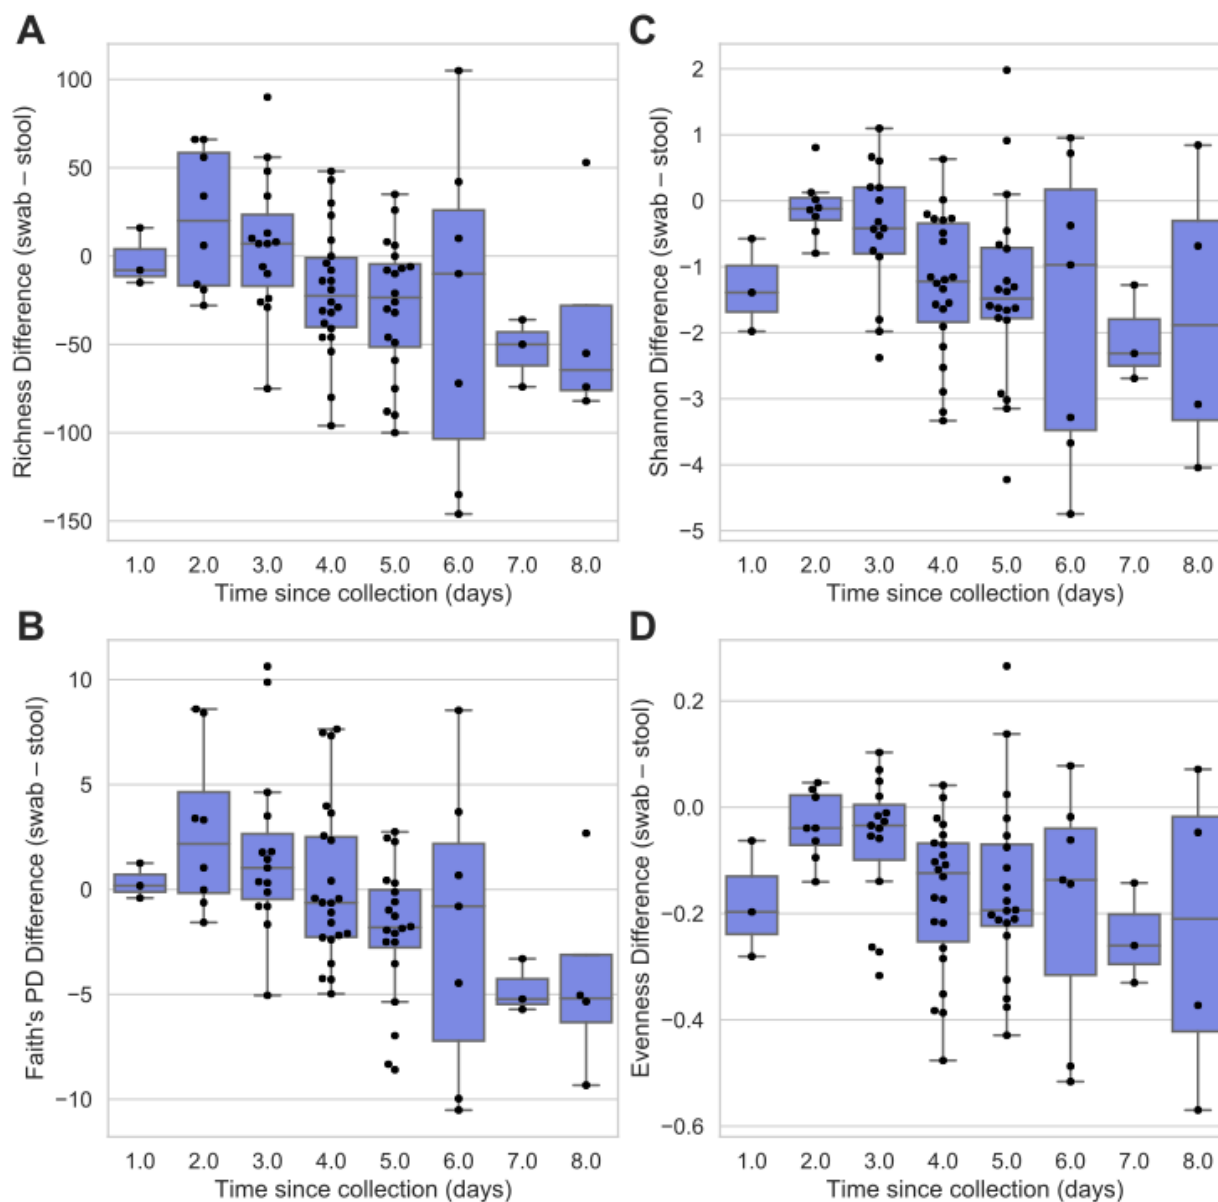

114

115 Figure 2. Observed differences in alpha diversity metrics between stool and swab paired  
116 samples in relation to transport time. Boxplots show quartile distributions of differences between  
117 paired samples (swab - stool observed diversity) for observed richness (A), Shannon H (B),  
118 Faith's PD (C), and evenness (D). Swarmplots are overlaid to show actual distribution of metric  
119 differences.

120

## 121 Supervised learning classification confirms accuracy of fresh swabs

122 To confirm the similarity of swab microbiota compared to stool microbiota, we used random  
123 forest (11) classification models to predict sample type (stool or swab) based on microbiota  
124 composition (16S rRNA gene sequence variants). Stool samples were compared to swab  
125 samples exposed to between 3-8 days of transport time (highly dissimilar from stool) or only 1-2  
126 day of transport time (more similar to stool). Swabs exposed to 3-8 days of transport time could  
127 be accurately classified 94.6% of the time, and stool samples 90.1% of the time. However,  
128 swabs exposed to  $\leq 2$  days of transport time could not be reliably distinguished from stool  
129 samples: swab samples were correctly classified only 47.1% of the time (random chance is  
130 50%). Notably, the most important features identified in each model were members of family  
131 *Enterobacteriaceae*.

132

133 Swabs are characterized by overrepresentation of *Enterobacteriaceae*  
134 compared to stool samples

135 Next we determined the impact of transport time on swab bacterial taxonomic composition  
136 compared to stool to identify taxa responsible for altered diversity patterns. The taxonomic  
137 compositions of swab samples became dominated by *Enterobacteriaceae* as transport time  
138 increased, leading to a notable disparity compared to stool samples collected from the same  
139 subject at the same time (Figure 3). *Enterobacteriaceae* relative abundance was positively  
140 correlated with transport time ( $R = 0.88$ ,  $P = 0.004$ ) (Figure 4). Paired ANCOM tests (12)  
141 between all paired samples (regardless of transport time) indicates that bacterial species in the  
142 families *Enterobacteriaceae* and *Bacillaceae* were overrepresented in swab samples ( $P < 0.05$ )



143 and a broad range of *Clostridiales* were overrepresented in stool (Table 1). While phylum  
144 Proteobacteria (represented mostly by family *Enterobacteriaceae*) was overrepresented in swab  
145 samples compared to their matching stool samples (slope > 1), most other phyla exhibited slight  
146 overrepresentation in stool (slope < 1) (Figure 5). Nevertheless, the abundances of all phyla are  
147 significantly correlated between swabs and their matching stool samples (Spearman R = 0.67, P  
148 < 0.0001) (Figure 5). This most likely indicates cellular growth of *Enterobacteriaceae* while other  
149 populations remain largely static and are supplanted at an approximately even rate. This could  
150 also indicate death and DNA degradation of these other populations, but that scenario seems  
151 much less likely given the short time frame of this experiment; however, we cannot discern  
152 changes to absolute abundance based on our compositional (relative abundance) sequence  
153 data.

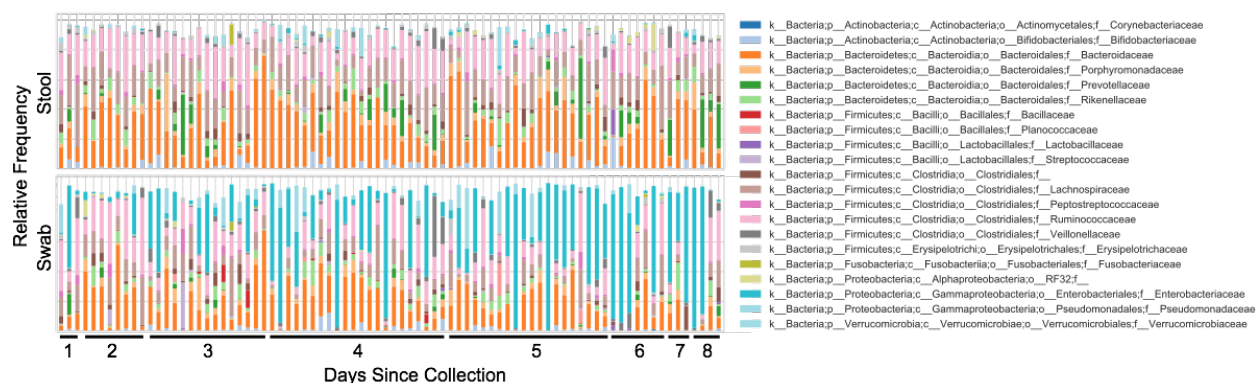

154  
155 Figure 3. Relative abundance of bacterial families in paired stool (top) and swab samples  
156 (bottom). Paired stool and swab samples collected from the same individual at the same time  
157 point are aligned along the x axis, and sorted by swab transport time.

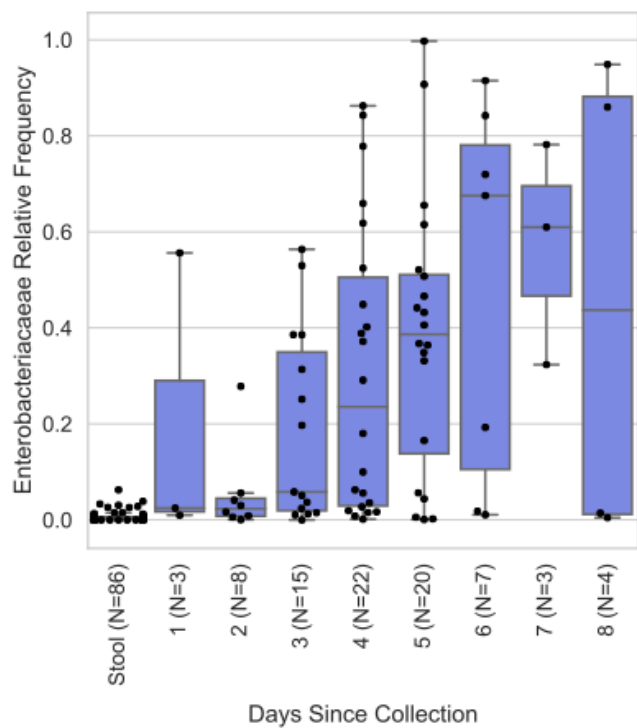

158

159 Figure 4. Distribution of *Enterobacteriaceae* relative frequencies in stool samples and in swab  
160 samples exposed to different transport times.

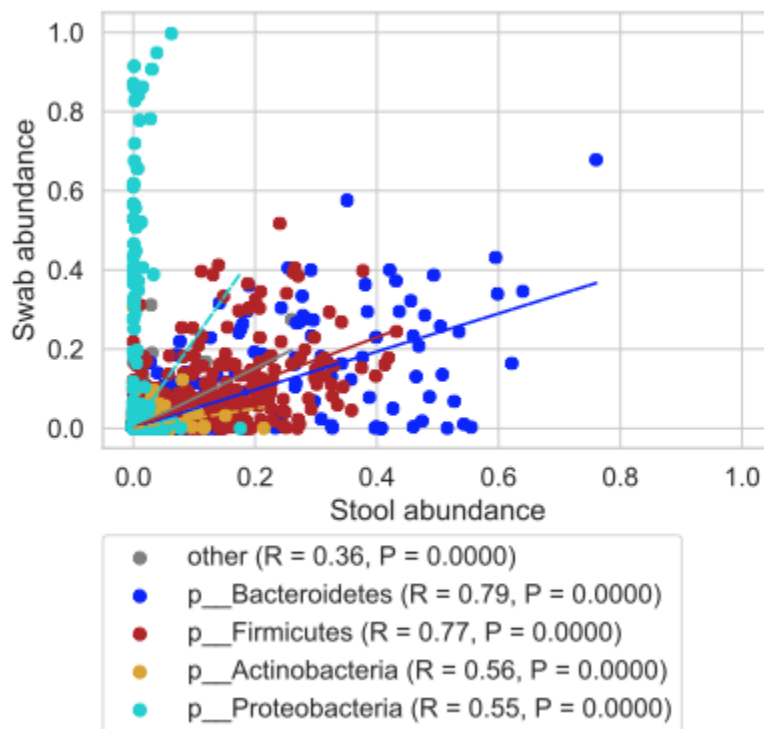

161

162 Figure 5. Scatterplot comparing relative abundances of all taxa observed in stool and swab  
 163 samples. Taxa are colored by their phylum affiliation (all other phyla are combined into “other”),  
 164 and linear regressions for each phylum are plotted. Spearman correlation coefficients (R) and P  
 165 values comparing stool and swab abundances for each phylum are shown in the legend.

166  
 167 Table 1. ANCOM differentially abundant sequence variants ( $P < 0.05$ ) between stool and swab  
 168 paired samples.

| Feature ID <sup>a</sup>          | Family                    | Genus and Species <sup>b</sup> | W <sup>c</sup> | Stool median | Stool max | Swab median | Swab max |
|----------------------------------|---------------------------|--------------------------------|----------------|--------------|-----------|-------------|----------|
| f3fc3c1992d8118d6105048408aaf6d6 | <i>Enterobacteriaceae</i> |                                | 2457           | 27.5         | 1932      | 2201.5      | 57802    |
| 8ce638638fc5ee9e2128ac4bd03ed11e | <i>Enterobacteriaceae</i> | <i>Klebsiella</i>              | 2455           | 1            | 10        | 1           | 35068    |
| 5a83ea3d76cd341dac86f333c7d5f293 | <i>Enterobacteriaceae</i> | <i>Citrobacter</i>             | 2436           | 1            | 18        | 1           | 18276    |
| c57bf51f33c656b83ae967392536b842 | <i>Enterobacteriaceae</i> | <i>Klebsiella</i>              | 2406           | 1            | 66        | 1           | 3235     |
| 801cc2f4b3dfb4b130c4ba7ef4a20094 | <i>Bacillaceae</i>        | <i>Bacillus</i>                | 2276           | 1            | 1         | 1           | 2076     |
| fb9c4b48fcb5d89827e4d868e63846a8 | <i>Lachnospiraceae</i>    | <i>Blautia</i>                 | 2213           | 169          | 4721      | 73.5        | 2374     |
| 2f561a0913fb0ed1a03d6cbdd1796e0c | <i>Lachnospiraceae</i>    | <i>Coproccoccus</i>            | 2294           | 122.5        | 2295      | 50.5        | 1321     |
| edfefd945764652423a9183e4934f63e | <i>Lachnospiraceae</i>    | <i>Roseburia</i>               | 2229           | 38           | 1327      | 1           | 769      |
| c4e55d1fa1d9152699f44847eec89821 | <i>Lachnospiraceae</i>    |                                | 2375           | 152.5        | 1544      | 46.5        | 701      |
| 6f063a38df307a2c50a525bf2ae85f7d | <i>Lachnospiraceae</i>    | <i>Blautia</i>                 | 2273           | 78           | 1996      | 34          | 536      |
| 8be4f08a4c290c121885c6d3abc32186 | <i>Ruminococcaceae</i>    | <i>Oscillospira</i>            | 2215           | 13.5         | 1217      | 1           | 455      |
| b54e516c620e7b11f1f267f154efe1f6 | <i>Lachnospiraceae</i>    |                                | 2212           | 13           | 464       | 1           | 150      |
| 4949d5468cabaee7de1a985e6a479a6a | <i>Lachnospiraceae</i>    | <i>Coproccoccus catus</i>      | 2234           | 14.5         | 154       | 1           | 146      |

|                                  |                        |                     |      |    |      |   |     |
|----------------------------------|------------------------|---------------------|------|----|------|---|-----|
| ebf3c3237392738d0fdeb35e9bb35bcd | <i>Alcaligenaceae</i>  | <i>Sutterella</i>   | 2407 | 21 | 1527 | 1 | 137 |
| efeef69c255be9b873b917707495b22f | <i>Lachnospiraceae</i> |                     | 2243 | 1  | 154  | 1 | 105 |
| 2d1be5a482c6d0a6b58a5d9b5f3c5b3d | <i>Ruminococcaceae</i> | <i>Oscillospira</i> | 2355 | 24 | 235  | 1 | 101 |
| 40a904445b77cf5125c51fb01f785193 | <i>Lachnospiraceae</i> |                     | 2248 | 1  | 279  | 1 | 97  |

169 <sup>a</sup> Feature identities equal the MD5 hashes of the 16S rRNA gene sequences identified as being  
170 differentially abundant between paired stool and swab samples.

171 <sup>b</sup> Genus and species name are shown where available. Any feature missing a genus and/or  
172 species label was classified as belonging to a species that is missing a genus and/or species  
173 annotation in the Greengenes 16S rRNA gene sequence reference database.

174 <sup>c</sup> W equals the number of ANCOM sub-hypotheses that have passed for each individual taxon,  
175 indicating that the ratio of that taxon and W other taxa were detected to be significantly different  
176 between stool and swab samples.

177 .

178

## 179 Discussion

180 This study has demonstrated the accuracy of swabs for approximating the composition of stool  
181 samples, and evaluated the effect of transport time. Previous authors have examined the  
182 reproducibility and accuracy of fresh swabs for approximating stool microbiota measurements  
183 (5). We extend these prior studies by demonstrating the impact of storage time on swab  
184 similarity to stool. This corroborates earlier findings that swab and stool samples yield similar  
185 biological conclusions (3, 5).

186 We show that swabs provide an accurate approximation of stool microbiota diversity,  
187 composition, and structure, provided that the swabs are processed as freshly as possible ( $\leq$  2  
188 days). Stool samples and swabs could not be reliably distinguished by supervised learning  
189 classification, indicating close resemblance between these collection methods. Long transport  
190 times are associated with overrepresentation of *Enterobacteriaceae* (probably due to growth  
191 under aerobic conditions), decreasing accuracy of microbiota profiles. Prospectively, this finding  
192 could be used to further enhance the use of swabs for fecal microbiota profiling. Except in  
193 scenarios where high levels of *Enterobacteriaceae* are a normal constituent of the intestinal  
194 microbiota, such as following gastric bypass surgery (13, 14), *Enterobacteriaceae* could be used  
195 as a marker for validating swab integrity, e.g., to reject outliers that may have experienced  
196 inadequate shipping or storage; modeling compositional changes over time could also support  
197 development of algorithms to correct for biases arising from collection and storage issues.

198 Stool collection is not always easy or convenient. This may be due to logistical constraints (e.g.,  
199 at-home collection or busy clinical settings), sample characteristics (e.g., fecal incontinence), or  
200 subject comfort. Stool swabs represent a viable alternative for measurement of distal gut  
201 microbial composition and diversity. Swabs are also considerably easier to handle and process  
202 than stool samples, streamlining collection and DNA extraction protocols. Although we find that  
203 stool and fresh swab samples could not be reliably distinguished by supervised learning  
204 classification, we do not recommend mixing stool and swab collection methods within the same  
205 study, in order to avoid introduction of experimental variation and potential sampling biases. For  
206 example, contamination and other artifactual biases could differ between collection methods  
207 and different brands of swabs, and variation should be minimized as much as possible. In  
208 studies where different collection methods become necessary, investigators should test to  
209 ensure that collection methods do not covary with other sample characteristics or metadata.

## 210 **Materials and methods**

### 211 Data availability

212 This study re-analyzed a previously published 16S rRNA gene sequence dataset (3), which is  
213 available in the open-source microbiome database Qiita ([qiita.microbio.me](http://qiita.microbio.me)) under the study ID  
214 number 10532.

### 215 Sample collection and processing

216 Stool samples and swabs were collected and processed as previously described in a study of  
217 autistic children receiving microbiota transfer therapy (3). Stool samples and fecal swabs were  
218 collected by subjects' parents. Fecal samples were stored in dry ice and collected by a driver,  
219 and frozen at -80°C immediately upon arrival at the laboratory. Swabs were shipped to the lab  
220 by standard postal mail. After defecation, fecal matter was collected from toilet paper using a  
221 sterile swab (Fisher Scientific BD Culture Swab item number B4320135), taking care not to  
222 contact the paper or overload the swab. Samples were shipped at room temperature and frozen  
223 at -80°C immediately upon arrival at the laboratory. Swab samples were primarily shipped within  
224 Arizona at different times of year, so temperatures (and hence shipping effects) may be slightly  
225 greater than other regions. The time between shipping and receipt was logged as "days in  
226 transit", as used to perform statistical analyses described below. DNA extraction and  
227 sequencing were performed as previously described, following the earth microbiome project  
228 standard protocol for 16S V4 rRNA gene sequencing with 515f-806r primers (15). A total of 123  
229 stools and 355 swabs were collected and analyzed in the current study, including 98 pairs of  
230 stool and swab samples that were collected from the same source stool. Swab transport times  
231 varied from 0 to 68 days; however, only days 1-8 contained sufficient sample size (minimum N =

232 3 stool-swab pairs) and were used for assessing the impact of transport time on swab  
233 composition accuracy compared to paired stools.

## 234 Microbiome analysis

235 Sequence data were processed and analyzed using QIIME 2 (7). Raw sequences were quality-  
236 filtered using DADA2 (16) to remove PhiX, chimeric, and erroneous reads. Sequence variants  
237 were aligned using mafft (17) and used to construct a phylogenetic tree using fasttree2 (18).  
238 Taxonomy was assigned to sequence variants using q2-feature-classifier (19) against the  
239 GreenGenes 16S rRNA reference database 13\_8 release (20).

## 240 Statistical analysis

241 QIIME 2 was used to measure the following microbiota alpha diversity metrics: richness (as  
242 observed sequence variants), Shannon diversity and evenness, and Phylogenetic Diversity (9).  
243 Microbiome beta diversity was estimated in QIIME 2 using weighted and unweighted UniFrac  
244 distance (8). Feature tables were evenly subsampled at 5,000 sequences per sample prior to  
245 alpha or beta diversity analyses.

246  
247 Alpha diversity differences and UniFrac distances between paired stool and swab samples from  
248 identical source samples (paired samples) were calculated using q2-longitudinal (21). ANCOM  
249 (12) was used to test whether the abundances of individual taxa differed between paired  
250 samples. Balance trees analysis and ordinary least squares regression on balances was  
251 performed using the q2-gneiss plugin (22). Spearman correlation coefficients were computed  
252 between transport time and median alpha diversity metrics, UniFrac distance, and  
253 *Enterobacteriaceae* relative abundance. Mann-Whitney U tests were used to test whether  
254 relative abundances of family *Enterobacteriaceae* were significantly different between stool

255 samples and swab samples exposed to different transport times. Supervised learning  
256 classification was performed in q2-sample-classifier (23), using random forests classifiers (11)  
257 grown with 500 trees, trained on a random subset of the data (80%) and validated on the  
258 remaining samples.

259

260

## 261 **Acknowledgments**

262 The authors thank James B. Adams (Arizona State University) for useful discussions. This work  
263 was supported in part by the Arizona Board of Regents, The Autism Research Institute, and the  
264 National Science Foundation (award 1565100 to JGC).

## 265 **References**

- 266 1. Gilbert JA, Blaser MJ, Caporaso JG, Jansson JK, Lynch SV, Knight R. 2018. Current  
267 understanding of the human microbiome. *Nat Med* 24:392–400.
- 268 2. Gevers D, Kugathasan S, Denson LA, Vázquez-Baeza Y, Van Treuren W, Ren B,  
269 Schwager E, Knights D, Song SJ, Yassour M, Morgan XC, Kostic AD, Luo C, González A,  
270 McDonald D, Haberman Y, Walters T, Baker S, Rosh J, Stephens M, Heyman M,  
271 Markowitz J, Baldassano R, Griffiths A, Sylvester F, Mack D, Kim S, Crandall W, Hyams J,  
272 Huttenhower C, Knight R, Xavier RJ. 2014. The treatment-naive microbiome in new-onset  
273 Crohn's disease. *Cell Host Microbe* 15:382–392.
- 274 3. Kang D-W, Adams JB, Gregory AC, Borody T, Chittick L, Fasano A, Khoruts A, Geis E,  
275 Maldonado J, McDonough-Means S, Pollard EL, Roux S, Sadowsky MJ, Lipson KS,  
276 Sullivan MB, Caporaso JG, Krajmalnik-Brown R. 2017. Microbiota Transfer Therapy alters  
277 gut ecosystem and improves gastrointestinal and autism symptoms: an open-label study.



278 Microbiome 5:10.

- 279 4. Bokulich NA, Chung J, Battaglia T, Henderson N, Jay M, Li H, D Lieber A, Wu F, Perez-  
280 Perez GI, Chen Y, Schweizer W, Zheng X, Contreras M, Dominguez-Bello MG, Blaser MJ.  
281 2016. Antibiotics, birth mode, and diet shape microbiome maturation during early life. *Sci*  
282 *Transl Med* 8:343ra82.
- 283 5. Sinha R, Chen J, Amir A, Vogtmann E, Shi J, Inman KS, Flores R, Sampson J, Knight R,  
284 Chia N. 2016. Collecting Fecal Samples for Microbiome Analyses in Epidemiology Studies.  
285 *Cancer Epidemiol Biomarkers Prev* 25:407–416.
- 286 6. Bassis CM, Moore NM, Lolans K, Seekatz AM, Weinstein RA, Young VB, Hayden MK,  
287 CDC Prevention Epicenters Program. 2017. Comparison of stool versus rectal swab  
288 samples and storage conditions on bacterial community profiles. *BMC Microbiol* 17:78.
- 289 7. Bolyen E, Rideout JR, Dillon MR, Bokulich NA, Abnet C, Al-Ghalith GA, Alexander H, Alm  
290 EJ, Arumugam M, Asnicar F, Bai Y, Bisanz JE, Bittinger K, Brejnrod A, Brislawn CJ, Titus  
291 Brown C, Callahan BJ, Caraballo-Rodríguez AM, Chase J, Cope E, Da Silva R, Dorrestein  
292 PC, Douglas GM, Durall DM, Duvallet C, Edwardson CF, Ernst M, Estaki M, Fouquier J,  
293 Gauglitz JM, Gibson DL, Gonzalez A, Gorlick K, Guo J, Hillmann B, Holmes S, Holste H,  
294 Huttenhower C, Huttley G, Janssen S, Jarmusch AK, Jiang L, Kaehler B, Kang KB, Keefe  
295 CR, Keim P, Kelley ST, Knights D, Koester I, Kosciulek T, Kreps J, Langille MGI, Lee J, Ley  
296 R, Liu Y-X, Lofffield E, Lozupone C, Maher M, Marotz C, Martin BD, McDonald D, McIver  
297 LJ, Melnik AV, Metcalf JL, Morgan SC, Morton J, Naimey AT, Navas-Molina JA, Nothias  
298 LF, Orchanian SB, Pearson T, Peoples SL, Petras D, Preuss ML, Pruesse E, Rasmussen  
299 LB, Rivers A, Michael S Robeson II, Rosenthal P, Segata N, Shaffer M, Shiffer A, Sinha R,  
300 Song SJ, Spear JR, Swafford AD, Thompson LR, Torres PJ, Trinh P, Tripathi A, Turnbaugh  
301 PJ, Ul-Hasan S, van der Hooft JJJ, Vargas F, Vázquez-Baeza Y, Vogtmann E, von Hippel

- 302 M, Walters W, Wan Y, Wang M, Warren J, Weber KC, Williamson CHD, Willis AD, Xu ZZ,  
303 Zaneveld JR, Zhang Y, Knight R, Gregory Caporaso J. 2018. QIIME 2: Reproducible,  
304 interactive, scalable, and extensible microbiome data science. e27295v1. PeerJ Preprints.
- 305 8. Lozupone C, Knight R. 2005. UniFrac: a new phylogenetic method for comparing microbial  
306 communities. *Appl Environ Microbiol* 71:8228–8235.
- 307 9. Faith DP. 1992. Conservation evaluation and phylogenetic diversity. *Biol Conserv* 61:1–10.
- 308 10. Song SJ, Amir A, Metcalf JL, Amato KR, Xu ZZ, Humphrey G, Knight R. 2016. Preservation  
309 Methods Differ in Fecal Microbiome Stability, Affecting Suitability for Field Studies.  
310 *mSystems* 1.
- 311 11. Breiman L. 2001. Random forests. *Mach Learn* 45:5–32.
- 312 12. Mandal S, Van Treuren W, White RA, Eggesbø M, Knight R, Peddada SD. 2015. Analysis  
313 of composition of microbiomes: a novel method for studying microbial composition. *Microb*  
314 *Ecol Health Dis* 26:27663.
- 315 13. Zhang H, DiBaise JK, Zuccolo A, Kudrna D, Braidotti M, Yu Y, Parameswaran P, Crowell  
316 MD, Wing R, Rittmann BE, Krajmalnik-Brown R. 2009. Human gut microbiota in obesity and  
317 after gastric bypass. *Proceedings of the National Academy of Sciences* 106:2365–2370.
- 318 14. Ilhan ZE, DiBaise JK, Isern NG, Hoyt DW, Marcus AK, Kang D-W, Crowell MD, Rittmann  
319 BE, Krajmalnik-Brown R. 2017. Distinctive microbiomes and metabolites linked with weight  
320 loss after gastric bypass, but not gastric banding. *ISME J* 11:2047–2058.
- 321 15. Caporaso JG, Lauber CL, Walters WA, Berg-Lyons D, Huntley J, Fierer N, Owens SM,  
322 Betley J, Fraser L, Bauer M, Gormley N, Gilbert JA, Smith G, Knight R. 2012. Ultra-high-  
323 throughput microbial community analysis on the Illumina HiSeq and MiSeq platforms. *ISME*

- 324 J 6:1621–1624.
- 325 16. Callahan BJ, McMurdie PJ, Rosen MJ, Han AW, Johnson AJA, Holmes SP. 2016. DADA2:  
326 High-resolution sample inference from Illumina amplicon data. *Nat Methods* 13:581–583.
- 327 17. Katoh K, Misawa K, Kuma K-I, Miyata T. 2002. MAFFT: a novel method for rapid multiple  
328 sequence alignment based on fast Fourier transform. *Nucleic Acids Res* 30:3059–3066.
- 329 18. Price MN, Dehal PS, Arkin AP. 2010. FastTree 2--approximately maximum-likelihood trees  
330 for large alignments. *PLoS One* 5:e9490.
- 331 19. Bokulich NA, Kaehler BD, Rideout JR, Dillon M, Bolyen E, Knight R, Huttley GA, Gregory  
332 Caporaso J. 2018. Optimizing taxonomic classification of marker-gene amplicon sequences  
333 with QIIME 2's q2-feature-classifier plugin. *Microbiome* 6:90.
- 334 20. McDonald D, Price MN, Goodrich J, Nawrocki EP, DeSantis TZ, Probst A, Andersen GL,  
335 Knight R, Hugenholtz P. 2012. An improved Greengenes taxonomy with explicit ranks for  
336 ecological and evolutionary analyses of bacteria and archaea. *ISME J* 6:610–618.
- 337 21. Bokulich NA, Dillon MR, Zhang Y, Rideout JR, Bolyen E, Li H, Albert PS, Caporaso JG.  
338 2018. q2-longitudinal: Longitudinal and Paired-Sample Analyses of Microbiome Data.  
339 *mSystems* 3:e00219–18.
- 340 22. Morton JT, Sanders J, Quinn RA, McDonald D, Gonzalez A, Vázquez-Baeza Y, Navas-  
341 Molina JA, Song SJ, Metcalf JL, Hyde ER, Lladser M, Dorrestein PC, Knight R. 2017.  
342 Balance Trees Reveal Microbial Niche Differentiation. *mSystems* 2.
- 343 23. Bokulich N, Dillon M, Bolyen E, Kaehler BD, Huttley GA, Gregory Caporaso J. 2018. q2-  
344 sample-classifier: machine-learning tools for microbiome classification and regression.  
345 *Journal of Open Source Software* 3:934.
